# Supplementary material for: On the Road to Biopolymer Aerogels—Dealing with the Solvent
Source: PubMed Central journal article supplement (PMC6318595; doi:10.3390/gels1020291), 2015-12-21
Supplement: gels-01-00291-s001.pdf [file gels-01-00291-s001.pdf]

## Supplementary Information

**Table S1.** Volumetric yield ( $Y_v$ ) of the gels after various process steps ( $\Delta C = 30$  wt % ethanol).

| Gel Composition | Before Gelation % | After Gelation % | Swelling % | SE (Step 1) % | SE (Step 2) % | SE (Step 3) % | SE (Step 4) % | Supercritical CO <sub>2</sub> Drying % |
|-----------------|-------------------|------------------|------------|---------------|---------------|---------------|---------------|----------------------------------------|
| I               | 100               | 78.3 ± 0.8       | 97.4 ± 1.8 | 81.5 ± 2.4    | 69.4 ± 1.3    | 63.8 ± 1.0    | 59.8 ± 0.5    | 41.1 ± 1.8                             |
| II              | 100               | 76.1 ± 0.7       | 88.8 ± 0.8 | 77.3 ± 0.7    | 38.6 ± 0.6    | 64.0 ± 0.9    | 60.6 ± 0.9    | 42.6 ± 1.3                             |
| III             | 100               | 72.4 ± 0.4       | 88.5 ± 0.8 | 68.4 ± 2.0    | 49.9 ± 0.9    | 41.3 ± 0.6    | 37.5 ± 0.5    | 19.0 ± 1.1                             |
| IV              | 100               | 54.5 ± 0.4       | 57.0 ± 0.7 | 49.8 ± 0.2    | 46.2 ± 0.2    | 43.7 ± 0.3    | 41.6 ± 0.2    | 26.4 ± 0.6                             |
| V               | 100               | 65.6 ± 0.5       | 90.7 ± 1.4 | 65.6 ± 1.3    | 41.1 ± 0.7    | 31.2 ± 0.2    | 27.6 ± 0.1    | 12.1 ± 1.5                             |
| VI              | 100               | 50.1 ± 0.9       | 49.6 ± 1.0 | 40.1 ± 0.2    | 36.7 ± 0.1    | 34.3 ± 0.2    | 32.1 ± 0.1    | 12.4 ± 0.3                             |

**Table S2.** Volumetric yield ( $Y_v$ ) of the gels after various process steps ( $\Delta C = 50$  wt % ethanol).

| Gel Composition | Before Gelation % | After Gelation % | Swelling % | SE (Step 1) % | SE (Step 2) % | SE (Step 3) % | Supercritical CO <sub>2</sub> Drying % |
|-----------------|-------------------|------------------|------------|---------------|---------------|---------------|----------------------------------------|
| I               | 100               | 78.9 ± 0.8       | 95.2 ± 1.6 | 66.3 ± 1.3    | 55.1 ± 0.4    | 53.6 ± 0.5    | 38.1 ± 1.9                             |
| II              | 100               | 76.8 ± 0.3       | 90.6 ± 1.3 | 66.3 ± 1.0    | 56.2 ± 0.3    | 54.8 ± 0.3    | 39.4 ± 0.8                             |
| III             | 100               | 72.2 ± 0.4       | 89.5 ± 1.2 | 44.4 ± 0.9    | 30.9 ± 0.1    | 29.2 ± 0.2    | 15.5 ± 0.4                             |
| IV              | 100               | 54.0 ± 0.7       | 57.0 ± 0.5 | 45.5 ± 0.2    | 40.6 ± 0.2    | 38.9 ± 0.4    | 21.9 ± 0.5                             |
| V               | 100               | 66.3 ± 0.4       | 90.1 ± 0.9 | 33.1 ± 1.2    | 20.8 ± 0.3    | 19.6 ± 0.3    | 8.7 ± 0.9                              |
| VI              | 100               | 50.2 ± 0.7       | 48.7 ± 0.3 | 34.2 ± 0.2    | 30.2 ± 0.1    | 29.0 ± 0.3    | 12.5 ± 0.9                             |

**Table S3.** Volumetric yield ( $Y_v$ ) of the gels after various process steps ( $\Delta C = 30$  wt % DMSO).

| Gel Composition | Before Gelation % | After Gelation % | Swelling % | SE (Step 1) % | SE (Step 2) % | SE (Step 3) % | SE (Step 4) % | Supercritical CO <sub>2</sub> Drying % |
|-----------------|-------------------|------------------|------------|---------------|---------------|---------------|---------------|----------------------------------------|
| I               | 100               | 80.7 ± 0.5       | 92.4 ± 1.0 | 87.9 ± 1.8    | 80.9 ± 2.1    | 76.7 ± 2.1    | 73.3 ± 1.9    | 35.4 ± 4.1                             |
| II              | 100               | 79.0 ± 0.7       | 91.7 ± 1.3 | 87.2 ± 1.0    | 81.4 ± 1.0    | 77.9 ± 0.8    | 74.6 ± 0.7    | 40.1 ± 0.8                             |
| III             | 100               | 76.1 ± 0.4       | 95.5 ± 2.0 | 93.7 ± 3.1    | 82.3 ± 1.2    | 70.6 ± 0.6    | 61.3 ± 0.7    | 19.4 ± 0.6                             |
| IV              | 100               | 52.2 ± 0.4       | 58.7 ± 1.0 | 55.8 ± 0.3    | 53.6 ± 0.3    | 52.0 ± 0.4    | 50.0 ± 0.1    | 24.3 ± 1.1                             |
| V               | 100               | 69.7 ± 0.6       | 88.0 ± 1.1 | 55.7 ± 0.3    | 50.1 ± 0.1    | 45.7 ± 0.1    | 41.7 ± 0.1    | 4.3 ± 0.9                              |
| VI              | 100               | 51.3 ± 0.6       | 50.0 ± 0.7 | 46.3 ± 0.7    | 43.4 ± 0.3    | 41.5 ± 0.3    | 39.3 ± 0.5    | 14.9 ± 0.5                             |

**Table S4.** Volumetric yield ( $Y_v$ ) of the gels after various process steps ( $\Delta C = 50$  wt % DMSO).

| Gel Composition | Before Gelation % | After Gelation % | Swelling % | SE (Step 1) % | SE (Step 2) % | SE (Step 3) % | Supercritical CO <sub>2</sub> Drying % |
|-----------------|-------------------|------------------|------------|---------------|---------------|---------------|----------------------------------------|
| I               | 100               | 80.0 ± 0.5       | 92.6 ± 1.2 | 77.1 ± 0.7    | 70.1 ± 1.0    | 68.5 ± 1.0    | 37.2 ± 2.1                             |
| II              | 100               | 79.2 ± 0.2       | 91.3 ± 0.5 | 76.8 ± 0.6    | 69.4 ± 0.6    | 67.6 ± 0.7    | 35.7 ± 0.8                             |
| III             | 100               | 76.1 ± 0.7       | 91.2 ± 0.6 | 67.1 ± 0.6    | 50.5 ± 0.9    | 46.9 ± 0.6    | 15.8 ± 0.8                             |
| IV              | 100               | 52.5 ± 0.1       | 58.2 ± 0.8 | 52.0 ± 0.3    | 48.6 ± 0.3    | 48.2 ± 1.4    | 25.9 ± 0.3                             |
| V               | 100               | 70.0 ± 0.4       | 88.5 ± 1.2 | 49.2 ± 0.3    | 42.7 ± 0.3    | 40.2 ± 0.3    | 4.5 ± 0.2                              |
| VI              | 100               | 51.3 ± 0.6       | 50.4 ± 0.2 | 42.4 ± 0.2    | 39.0 ± 0.2    | 37.2 ± 0.3    | 13.9 ± 0.4                             |

**Table S5.** Calculated  $q_e$  ( $g_{sol}/g_{gel}$ ) values for various gel compositions for 30% ethanol concentration gradient.

| Gel Composition | I             | II            | III           | IV            | V             | VI            |
|-----------------|---------------|---------------|---------------|---------------|---------------|---------------|
| Step 1          | 0.296 ± 0.003 | 0.296 ± 0.003 | 0.309 ± 0.005 | 0.308 ± 0.009 | 0.307 ± 0.005 | 0.308 ± 0.003 |
| Step 2          | 0.240 ± 0.007 | 0.251 ± 0.003 | 0.214 ± 0.001 | 0.276 ± 0.005 | 0.148 ± 0.025 | 0.280 ± 0.006 |
| Step 3          | 0.226 ± 0.011 | 0.236 ± 0.002 | 0.191 ± 0.016 | 0.262 ± 0.011 | 0.148 ± 0.010 | 0.156 ± 0.007 |

**Table S6.** Calculated  $k_2$  ( $\times 10^2$ ) ( $g_{sol}/g_{gel} \cdot \text{min}^{-1}$ ) values for various gel compositions for 30% ethanol concentration gradient.

| Gel Composition | I             | II            | III           | IV            | V             | VI            |
|-----------------|---------------|---------------|---------------|---------------|---------------|---------------|
| Step 1          | 3.440 ± 0.716 | 3.373 ± 0.325 | 2.779 ± 0.190 | 4.851 ± 0.724 | 3.128 ± 0.300 | 6.013 ± 0.217 |
| Step 2          | 2.679 ± 0.301 | 3.247 ± 0.401 | 2.980 ± 0.089 | 3.819 ± 0.285 | 3.706 ± 0.781 | 4.325 ± 0.361 |
| Step 3          | 3.429 ± 0.437 | 3.141 ± 0.348 | 3.300 ± 0.441 | 3.729 ± 0.370 | 4.864 ± 0.575 | 4.617 ± 1.073 |

**Table S7.** Calculated  $h$  ( $\times 10^3$ ) ( $g_{sol}/g_{gel} \cdot \text{min}^{-1}$ ) values for various gel compositions for 30% ethanol concentration gradient.

| Gel Composition | I             | II            | III           | IV            | V             | VI            |
|-----------------|---------------|---------------|---------------|---------------|---------------|---------------|
| Step 1          | 2.778 ± 0.252 | 2.948 ± 0.267 | 2.656 ± 0.160 | 4.589 ± 0.486 | 2.934 ± 0.195 | 5.709 ± 0.253 |
| Step 2          | 1.534 ± 0.094 | 2.056 ± 0.300 | 1.366 ± 0.049 | 2.898 ± 0.170 | 0.789 ± 0.118 | 3.380 ± 0.149 |
| Step 3          | 1.744 ± 0.166 | 1.749 ± 0.207 | 1.186 ± 0.038 | 2.542 ± 0.155 | 1.067 ± 0.129 | 3.125 ± 0.496 |

**Table S8.** Calculated  $q_e$  ( $g_{sol}/g_{gel}$ ) values for various gel compositions for 30% DMSO concentration gradient.

| Gel Composition | I             | II            | III           | IV            | V             | VI            |
|-----------------|---------------|---------------|---------------|---------------|---------------|---------------|
| Step 1          | 0.233 ± 0.004 | 0.231 ± 0.001 | 0.241 ± 0.005 | 0.238 ± 0.003 | 0.237 ± 0.003 | 0.237 ± 0.003 |
| Step 2          | 0.197 ± 0.009 | 0.207 ± 0.001 | 0.186 ± 0.012 | 0.213 ± 0.004 | 0.168 ± 0.003 | 0.202 ± 0.005 |
| Step 3          | 0.213 ± 0.003 | 0.210 ± 0.007 | 0.150 ± 0.016 | 0.219 ± 0.003 | 0.163 ± 0.004 | 0.211 ± 0.006 |

**Table S9.** Calculated  $k_2$  ( $\times 10^2$ ) ( $g_{sol}/g_{gel} \cdot \text{min}^{-1}$ ) values for various gel compositions for 30% DMSO concentration gradient.

| Gel Composition | I             | II            | III           | IV             | V             | VI             |
|-----------------|---------------|---------------|---------------|----------------|---------------|----------------|
| Step 1          | 8.617 ± 0.669 | 8.232 ± 0.437 | 8.135 ± 0.915 | 12.990 ± 0.478 | 7.899 ± 0.294 | 12.92 ± 0.110  |
| Step 2          | 7.678 ± 1.129 | 6.658 ± 0.487 | 6.545 ± 0.643 | 12.820 ± 0.751 | 7.337 ± 1.385 | 12.870 ± 0.274 |
| Step 3          | 3.364 ± 0.396 | 3.775 ± 0.403 | 3.664 ± 0.672 | 5.251 ± 0.480  | 3.657 ± 0.132 | 5.433 ± 0.549  |

**Table S10.** Calculated  $h$  ( $\times 10^3$ ) ( $g_{sol}/g_{gel} \cdot \text{min}^{-1}$ ) values for various gel compositions for 30% DMSO concentration gradient.

| Gel Composition | I             | II            | III           | IV            | V             | VI            |
|-----------------|---------------|---------------|---------------|---------------|---------------|---------------|
| Step 1          | 4.661 ± 0.211 | 4.395 ± 0.228 | 4.728 ± 0.548 | 7.391 ± 0.357 | 4.444 ± 0.202 | 7.249 ± 0.485 |
| Step 2          | 2.970 ± 0.182 | 2.858 ± 0.205 | 2.266 ± 0.232 | 5.786 ± 0.097 | 2.082 ± 0.426 | 5.249 ± 0.262 |
| Step 3          | 1.521 ± 0.140 | 1.662 ± 0.082 | 0.807 ± 0.063 | 2.531 ± 0.283 | 0.973 ± 0.022 | 2.419 ± 0.184 |

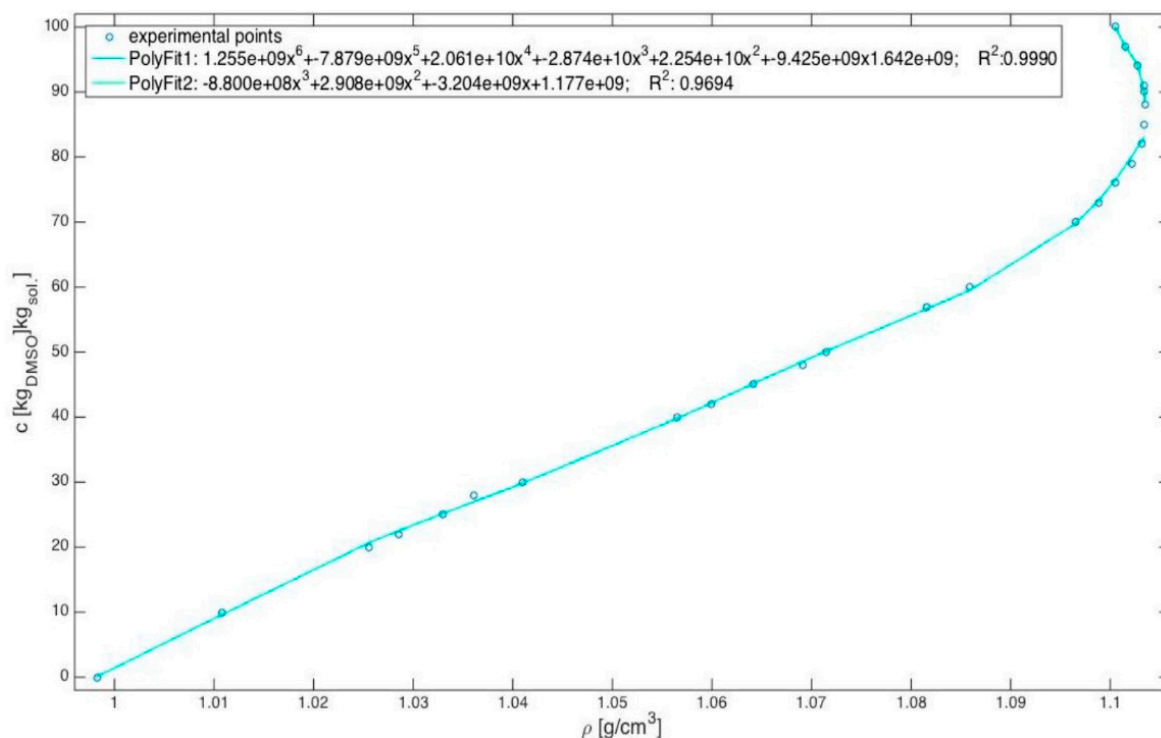

**Figure S1.** Experimentally determined calibration graph of binary water-DMSO mixture.

© 2015 by the authors; licensee MDPI, Basel, Switzerland. This article is an open access article distributed under the terms and conditions of the Creative Commons Attribution license (<http://creativecommons.org/licenses/by/4.0/>).
